# Supplementary material for: Episyrphus balteatus symbiont variation across developmental stages, living states, two sexes, and potential horizontal transmission from prey or environment
Source: Front Microbiol. 2024 Jan 5;14:1308393. doi: 10.3389/fmicb.2023.1308393 (PMC10797133; doi:10.3389/fmicb.2023.1308393)
Supplement: Supplementary file 1 [file Table_1.XLSX]

## Sheet: Sheet1
Sample ID	Summary of sequencing read				Alpha diversity index
	Raw CCS	Clean CCS	Effective CCS	AvgLen(bp)	Effective(%)	Sobs	Chao1	ACE	Simpson	Shannon	PD_whole_tree	Coverage
Ms-1	14638	14637	14532	1464	99.28	15	15.75	17.8575	0.1039	0.3946	1.4767	0.9998
Ms-2	13609	13609	13483	1465	99.07	22	27	25.3332	0.2254	0.716	2.027	0.9996
Ms-3	13610	13609	13583	1465	99.8	28	31.2727	35.5316	0.1171	0.4532	2.5162	0.9993
Ms-4	12140	12137	12131	1465	99.93	16	30	25.5419	0.0288	0.1277	1.792	0.9993
Ms-5	14183	14181	14110	1464	99.49	24	33	57.9401	0.2428	0.8314	2.3885	0.9994
FD3DPE-1	14596	14596	14522	1462	99.49	15	20	29.715	0.1607	0.5805	1.2744	0.9997
FD3DPE-2	13219	13219	13101	1459	99.11	14	20	17.9247	0.4734	1.4355	1.2142	0.9997
FD3DPE-3	13245	13245	13222	1459	99.83	8	9	8	0.2718	0.8612	0.6832	0.9998
FD3DPE-4	12737	12736	12728	1442	99.93	18	21	21.7119	0.6926	2.0688	1.6329	0.9997
FD3DPE-5	13763	13763	13722	1460	99.7	13	14	15.2028	0.3178	0.9111	1.515	0.9998
FDN-1	12068	12068	11993	1435	99.38	28	37	42.55	0.7697	2.4409	2.2405	0.9992
FDN-2	12184	12184	12168	1442	99.87	24	29	30.2547	0.6488	1.9442	2.1698	0.9995
FDN-3	12943	12943	12758	1433	98.57	20	20.25	21.581	0.7667	2.4653	2.8832	0.9998
FDN-4	12189	12189	12103	1445	99.29	29	36	36.6677	0.6586	2.1475	2.3874	0.9994
FDN-5	14772	14771	14270	1441	96.6	34	56	109.903	0.7905	2.6775	2.4379	0.9991
L3-1	13149	13149	12651	1473	96.21	44	53.1667	66.2099	0.7211	2.3189	3.2621	0.9991
L3-2	13367	13367	12922	1474	96.67	40	41.5	41.9363	0.6685	2.0955	2.895	0.9997
L3-3	12271	12271	11924	1474	97.17	32	46	41.0783	0.6282	1.7876	2.5907	0.9993
L3-4	14082	14082	13558	1471	96.28	33	47	54.7392	0.735	2.3091	2.5065	0.9993
L3-5	12221	12221	11757	1471	96.2	38	43	43.6901	0.7356	2.428	2.8032	0.9995
MD3DPE-1	12987	12987	12955	1464	99.75	8	11	27.151	0.0965	0.3317	0.9613	0.9998
MD3DPE-2	14437	14436	14200	1464	98.36	10	10.5	11.641	0.2059	0.6482	1.1932	0.9999
MD3DPE-3	14882	14882	14685	1464	98.68	29	30.2	31.1322	0.4971	1.4556	3.392	0.9997
MD3DPE-4	12383	12383	12198	1461	98.51	9	9	9.75	0.2858	0.9772	1.3535	0.9999
MD3DPE-5	14682	14682	14614	1464	99.54	8	8	8.6	0.2129	0.7002	0.9803	0.9999
MDN-1	12301	12301	12185	1451	99.06	32	41.1667	103.041	0.7633	2.5102	3.2431	0.9991
MDN-2	12341	12339	12142	1453	98.39	33	35.5	37.1747	0.6237	2.1637	2.3845	0.9995
MDN-3	12095	12094	11963	1444	98.91	44	48.6667	51.1614	0.7941	2.664	4.926	0.9993
MDN-4	14387	14387	14089	1465	97.93	21	23	24.1182	0.5705	1.7082	1.9494	0.9997
MDN-5	13817	13816	13604	1443	98.46	38	71	61.1144	0.6664	2.166	3.2215	0.9991
FN-1	13454	13454	13024	1453	96.8	49	68.125	72.1382	0.7629	2.5389	4.9648	0.9986
FN-2	13324	13295	13181	1446	98.93	24	33.3333	58.2322	0.6155	1.7771	4.7461	0.9994
FN-3	12152	12152	11901	1463	97.93	13	13.5	20.5777	0.2279	0.8585	0.9658	0.9998
FN-4	9911	9903	9901	1432	99.9	24	29	34.7454	0.6211	2.1548	6.7711	0.9995
FN-5	14891	14891	14851	1458	99.73	13	16	16.164	0.3132	0.798	1.6945	0.9997
MN-1	14191	14191	14152	1458	99.73	11	11	12.0329	0.4107	1.3162	1.2809	0.9999
MN-2	12892	12892	12867	1449	99.81	34	43	44.459	0.6362	2.0014	2.5766	0.9993
MN-3	13761	13758	13740	1450	99.85	40	47.3333	61.366	0.681	2.2394	2.505	0.9991
MN-4	12035	12031	11967	1445	99.43	31	37	40.5025	0.7126	2.327	2.9322	0.9992
MN-5	13280	13280	13082	1459	98.51	21	26	27.472	0.4351	1.282	1.9085	0.9995
Pupa-1	14494	14493	13601	1461	93.84	73	74.25	75.6237	0.8291	3.6567	4.3657	0.9996
Pupa-2	14760	14759	14204	1465	96.23	61	64	64.1025	0.7101	2.7913	3.6728	0.9996
Pupa-3	13515	13514	13094	1458	96.88	78	81	82.743	0.9224	4.5047	4.2162	0.9995
Pupa-4	11892	11891	11234	1457	94.47	70	71.6667	72.6493	0.8748	3.9331	3.9274	0.9996
Pupa-5	13956	13956	13356	1462	95.7	72	77.625	79.9642	0.7912	3.2651	4.0716	0.9992
